# Supplementary material for: Accounting for single center effects in systematic reviews cannot be overlooked
Source: Springer Nature journal article supplement (doi:10.1186/s13054-017-1804-0), 2017-09-15
Supplement: MOESM1 [file 15063440]

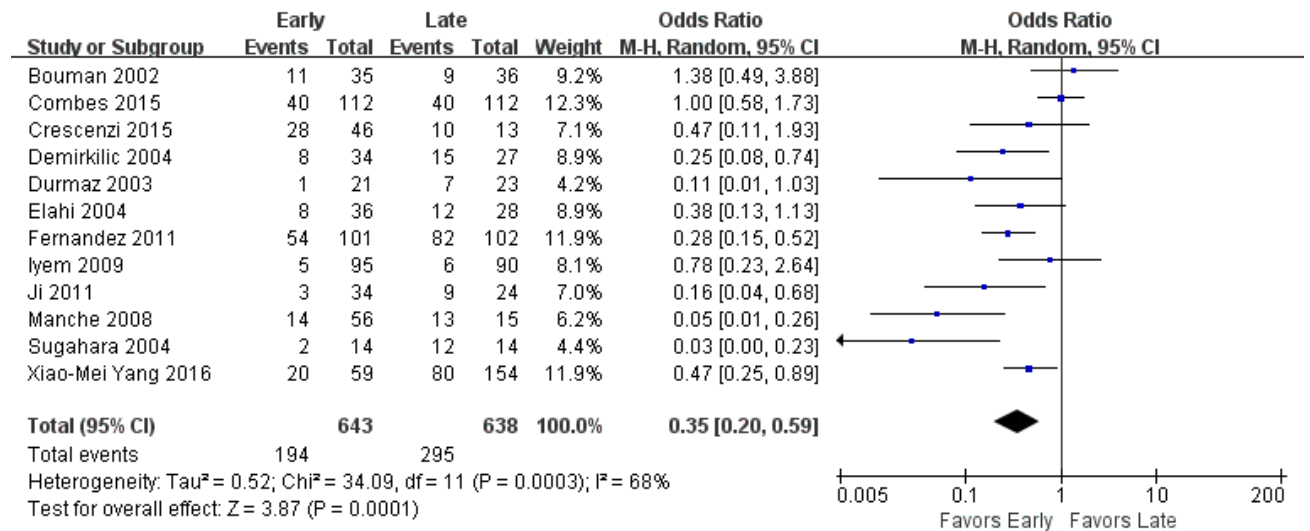

Additional file 1: Forest plots showed early RRT initiation group decreased 28-day mortality in patients with AKI after cardiac surgery.
