# Supplementary material for: Accounting for single center effects in systematic reviews cannot be overlooked
Source: Springer Nature journal article supplement (doi:10.1186/s13054-017-1804-0), 2017-09-15
Supplement: MOESM2 [file 15063440]

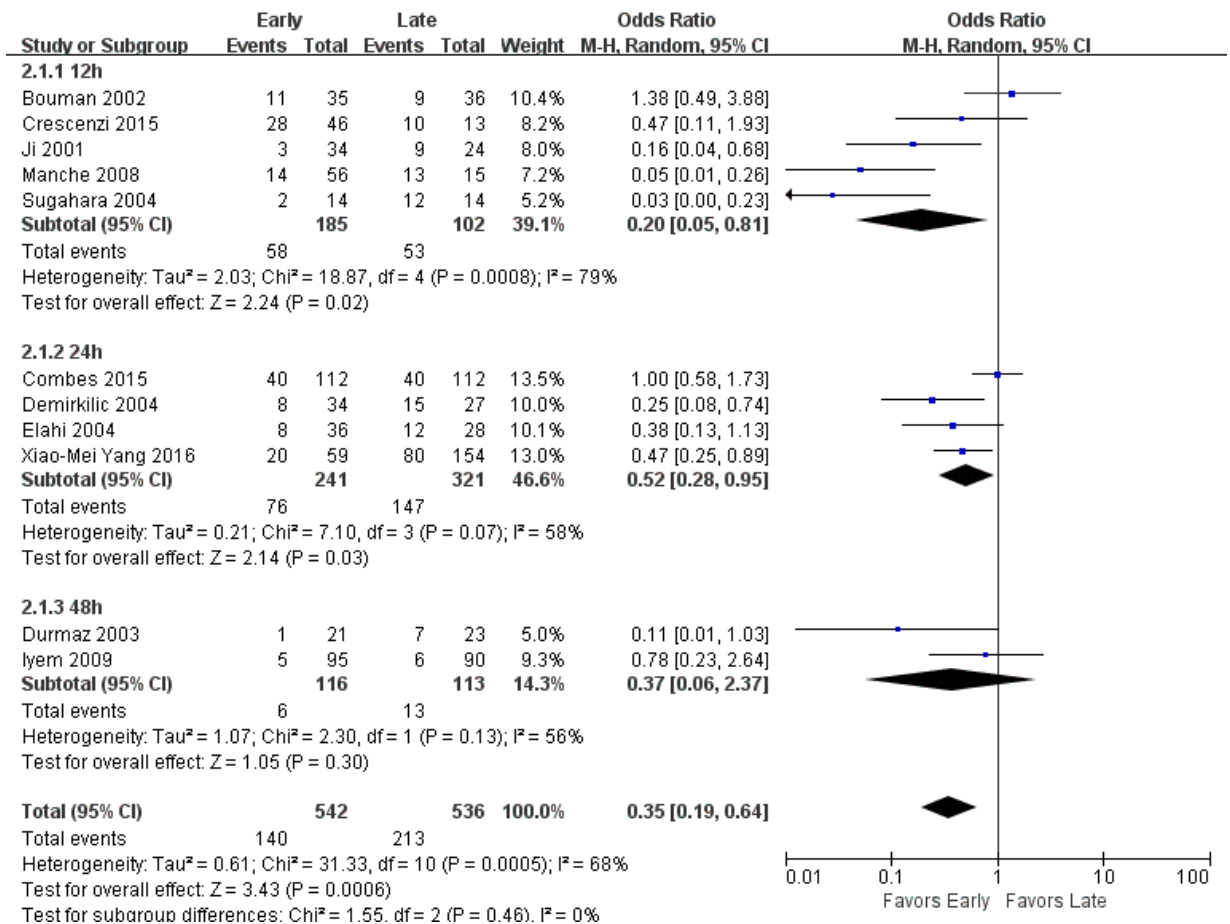

Additional file 2: The subgroup analysis showed early RRT initiation within 24 hours was associated with low mortality in patients with AKI after cardiac surgery.
